# Supplementary material for: Development of a droplet cathode glow discharge excitation source for high throughput detection of Li, Ca and K in serum samples
Source: Royal Society of Chemistry journal article supplement (doi:10.1039/d4ja00035h), 2024-01-01
Supplement: d4ja00035h1.pdf [file d4ja00035h1.pdf]

# **Development of a droplet cathode glow discharge excitation source for high throughput detection of Li, Ca and K in serum samples**

Jinzhao Liu,<sup>2,#</sup> Junhang Dong,<sup>1,#</sup> Shanru Han,<sup>2</sup> Jingwen Zhang,<sup>1</sup> Xing Liu,<sup>1</sup> Hongtao  
Zheng<sup>2</sup> and Zhenli Zhu,<sup>1,2,3\*</sup>

<sup>1</sup> State Key Laboratory of Biogeology and Environmental Geology, School of Earth  
Sciences, China University of Geosciences, Wuhan 430074, China

<sup>2</sup> Faculty of Material Science and Chemistry, China University of Geosciences, Wuhan  
430074, China

<sup>3</sup> Hubei Key Laboratory of Yangtze Catchment Environmental Aquatic Science,  
Wuhan, 430078, China

# Jinzhao Liu and Junhang Dong contribute equally to the article.

## **Correspondence and requests for materials should be addressed to:**

Dr. Zhenli Zhu, State Key Laboratory of Biogeology and Environmental Geology,  
China University of Geosciences, Wuhan 430074, China, Email: [zljzhu@cug.edu.cn](mailto:zljzhu@cug.edu.cn)

## **Table of Contents**

Fig. S1 The circuit control diagram of the DCGD-OES system.

Fig. S2 The logic diagram illustration of the control of DCGD system.

Fig. S3 (a) Calibration plots for Li, Ca, and K by DCGD-OES. Intensities have been corrected for blank emission.

Table S1 Comparison of detection limits between DCGD-OES and previous studies.

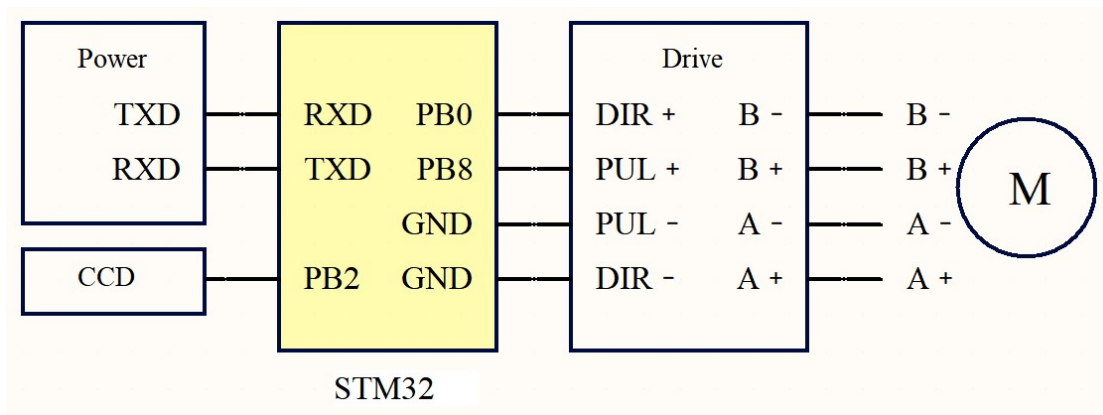

Fig. S1 The circuit control diagram of the DCGD-OES system.

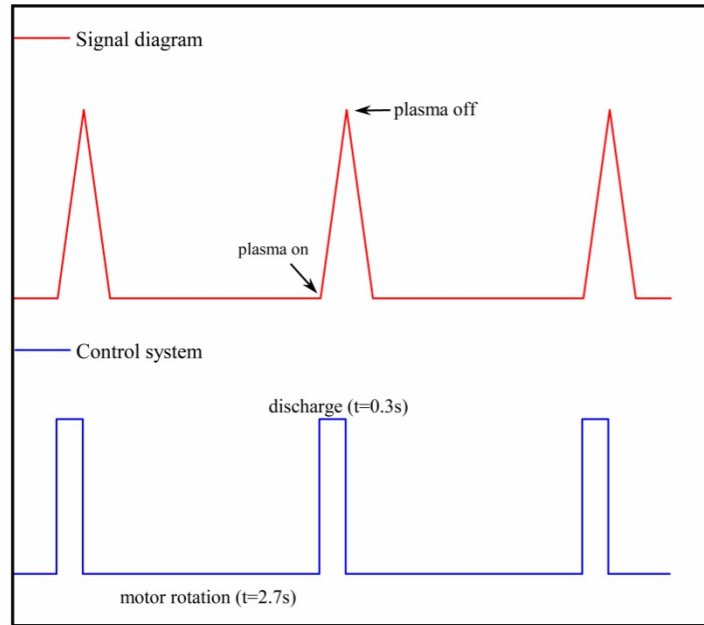

Fig. S2 The logic diagram illustration of the control of DCGD system.

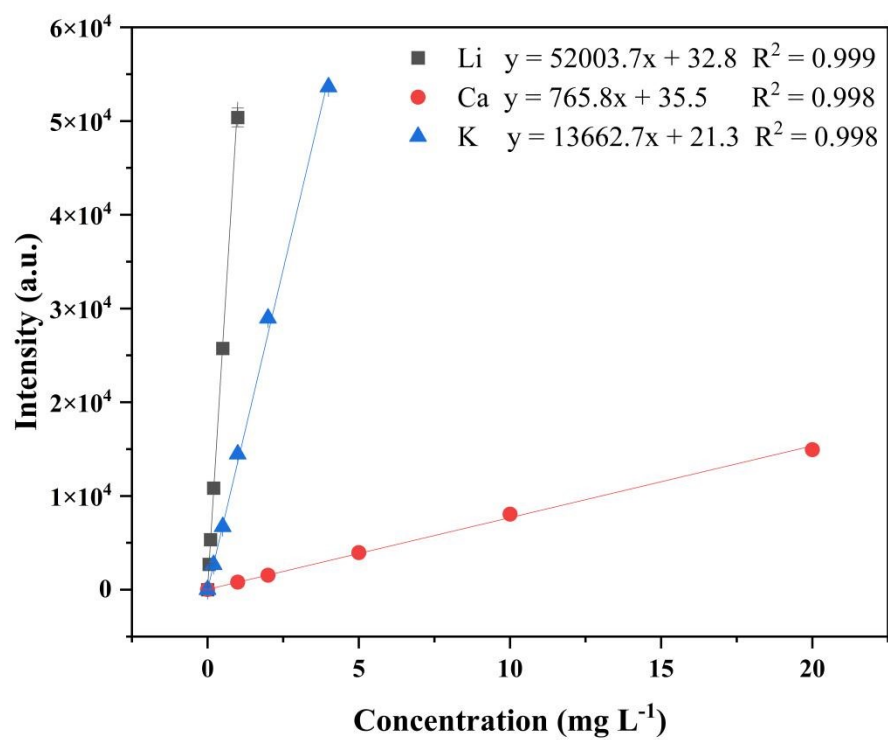

Fig. S3 (a) Calibration plots for Li, Ca, and K by DCGD-OES. Intensities have been corrected for blank emission.

Table S1. Comparison of detection limits between DCGD-OES and previous studies.

| Method   | LOD (mg L <sup>-1</sup> ) |        |         | Absolute LOD (pg) |       |      | References |
|----------|---------------------------|--------|---------|-------------------|-------|------|------------|
|          | Li                        | Ca     | k       | Li                | Ca    | k    |            |
| SCGD-OES | —                         | 0.011  | 0.00049 | —                 | 6600  | 294  | 1          |
| SCGD-OES | —                         | 0.023  | 0.013   | —                 | 13410 | 7600 | 2          |
| SCGD-OES | 0.0008                    | —      | 0.003   | 2                 | —     | 70   | 3          |
| ICP-OES  | 0.001                     | 0.0006 | 0.004   | 2000              | 1200  | 8000 | 4          |
| DCGD-OES | 0.002                     | 0.078  | 0.005   | 20                | 780   | 50   | This work  |

## References

1. C. Yang, L. Wang, Z. Zhu, L. Jin, H. Zheng, N. S. Belshaw and S. Hu, Evaluation of flow injection-solution cathode glow discharge-atomic emission spectrometry for the determination of major elements in brines, *Talanta*, 2016, **155**, 314-320.
2. J. Yu, X. Zhang, Q. Lu, L. Yin, F. Feng, H. Luo and Y. Kang, Liquid cathode glow discharge as an excitation source for the analysis of complex water samples with atomic emission spectrometry, *ACS Omega*, 2020, **5**, 19541-19547.
3. Z. Wang, A. J. Schwartz, S. J. Ray and G. M. Hieftje, Determination of trace sodium, lithium, magnesium, and potassium impurities in colloidal silica by slurry introduction into an atmospheric-pressure solution-cathode glow discharge and atomic emission spectrometry, *J. Anal. At. Spectrom.*, 2013, **28**, 234-240.
4. S.-L. Zhou, S.-J. Liu, X.-Y. Jiang, G.-H. Chen, C. Cao, F.-Y. Liu and X.-Q. Chen, Determination of four additives in aluminum electrolyte by ICP-OES with wet digestion, *Microchem J.*, 2010, **96**, 412-414.
